1 **Evaluation of near infrared spectroscopy for sporozoite detection in mosquitoes infected with wild-**  
2 **strain parasites from asymptomatic gametocyte carriers in Kilifi Kenya**

3

4 **Authors:** Marta F. Maia<sup>1,2,3,4,\*</sup>, Martin G. Wagah<sup>1,5</sup>, Jonathan Karisa<sup>1</sup>, Robert Mwakesi<sup>1</sup>, Festus Mure<sup>1</sup>, Martha  
5 Muturi<sup>1</sup>, Juliana Wambua<sup>1</sup>, Mainga Hamaluba<sup>1,2</sup>, Floyd E. Dowell<sup>6</sup>, Philip Bejon<sup>1,2</sup> and Melissa C. Kapulu<sup>1,2</sup>

6

7 **Affiliations**

8 <sup>1</sup> KEMRI Wellcome Trust Research Programme, P.O. Box 230, 80108 - Kilifi, Kenya.

9 <sup>2</sup> University of Oxford, Nuffield Department of Medicine, Centre for Tropical Medicine and Global Health,

10 Old Road Campus Roosevelt Drive, Oxford OX3 7FZ, United Kingdom.

11 <sup>3</sup> Swiss Tropical and Public Health Institute, Socinstrasse 57, 4020-Basel, Switzerland.

12 <sup>4</sup> University of Basel, Petersplatz 1, 4001-Basel, Switzerland

13 <sup>5</sup> Wellcome Sanger Institute, Wellcome Genome Campus, Hinxton, Cambridge CB10 91SA, United Kingdom

14 <sup>6</sup> USDA, Agricultural Research Service, Center for Grain and Animal Health Research, 1515 College Avenue,  
15 Manhattan, KS, 66502, United States of America.

16 \* Corresponding author

17

18 **Contacts:**

|                 |                              |
|-----------------|------------------------------|
| Marta Maia      | mmaia@kemri-wellcome.org     |
| Martin Wagah    | mw21@sanger.ac.uk            |
| Jonathan Karisa | kjonathan@kemri-wellcome.org |
| Festus Mure     | fmure@kemri-wellcome.org     |
| Robert Mwakesi  | rmwakesi@kemri-wellcome.org  |
| Martha Muturi   | mmuturi@kemri-wellcome.org   |
| Juliana Wambua  | jwambua@kemri-wellcome.org   |
| Mainga Hamaluba | mhamaluba@kemri-wellcome.org |
| Floyd Dowell    | floyd.dowell@ars.usda.gov    |
| Philip Bejon    | pbejon@kemri-wellcome.org    |
| Melissa Kapulu  | mkapulu@kemri-wellcome.org   |

19 **ABSTRACT (325 words)**

20 **Background:** Screening for *Plasmodium* spp. sporozoite infection in mosquitoes is routinely done using  
21 ELISA (enzyme-linked immunosorbent assay). Near infrared spectroscopy (NIRS), a fast and non-  
22 destructive method, has recently been shown to distinguish, with 95% accuracy, between uninfected and  
23 sporozoite-infected mosquitoes using laboratory strains of *Plasmodium falciparum* (PfN54). The aim of this  
24 present study was to further investigate the reproducibility of NIRS to identify sporozoite infection in  
25 mosquitoes infected using field isolates of *P. falciparum* gametocytes from asymptomatic carriers.

26  
27 **Methods:** Healthy individuals (aged 5 years and above) were screened for gametocytaemia by thick-smear  
28 microscopy in an area of moderate transmission along the Coast of Kenya between May and September  
29 2018. Asymptomatic gametocyte carriers were recruited for mosquito feeding assays, direct membrane  
30 feeding (DMFA) and direct skin feeding (DFA), using insectary-reared *Anopheles gambiae* s.s (Kilifi strain).  
31 Mosquitoes were kept for 14-days post feeding after which they were scanned using NIRS and  
32 subsequently analysed for sporozoite infection using circumsporozoite-ELISA. Predictive models were  
33 explored using partial least square regressions (PLS).

34  
35 **Results:** Two hundred and ninety-nine (299) individuals were screened for malaria parasites, 74 (24.8%)  
36 were found with circulating asexual parasites, and 16 (5.4%) with *P. falciparum* gametocyte stages.  
37 Fourteen (14) asymptomatic gametocyte carriers were recruited to the study for mosquito feeding assays.  
38 A total of 134 (7%, 134/1881) sporozoite-infected mosquitoes were obtained from 9 successful  
39 experiments. Three different training datasets composed of infected and uninfected mosquitoes were  
40 analysed. The PLS models were unable to distinguish between sporozoite-infected and uninfected  
41 mosquitoes. A predictive model could not be generated.

42  
43 **Conclusions:** The results of this study were not consistent with previous published research on NIRS for  
44 detection of sporozoite infection in the same mosquito species and may reflect differences between  
45 laboratory and field conditions. The current findings indicate that methods for sporozoite detection should  
46 be tested on field isolates at an early stage in their development and are informative for future research  
47 seeking novel high-throughput methods for parasite detection in mosquitoes.

48 **Keywords:** Near-infrared spectroscopy, *Anopheles gambiae*, *Plasmodium falciparum*, sporozoites, direct  
49 membrane feeding assay, direct feeding assay, gametocytes, partial least squares regression, Kilifi, Kenya

## 50 INTRODUCTION

51 The WHO's Global Technical Strategy for Malaria which seeks to reduce malaria incidence and related  
52 mortality by at least 90% and to eliminate the disease in a minimum of 35 countries by 2030 is off-track [1].  
53 New control tools are needed and surveillance must be implemented as a core intervention to better inform  
54 malaria control programmes as well as the development of new control tools [2]. Human host parameters,  
55 such as asymptomatic community parasite prevalence, are widely used to reflect transmission intensity,  
56 but malaria transmission is most directly estimated using entomological parameters by measuring the  
57 proportion of sporozoite-infected Anopheline mosquitoes that attempt to bite humans in space and time.  
58 Screening for sporozoite infection in mosquitoes is routinely done using ELISA (enzyme-linked  
59 immunosorbent assay) [3], but it is a time-consuming and laborious process, hence our current reliance on  
60 indirect measures of transmission by monitoring infection in the host. New spectral methods such as NIRS  
61 (near infrared spectroscopy) and MALDI-TOF MS (matrix-assisted laser desorption/ionization time-of-  
62 flight) are currently being researched as potential alternatives [4] as they could provide high-throughput  
63 and lower cost per sample allowing surveillance and elimination programmes to screen large numbers of  
64 mosquitoes and thus better estimate the EIR (entomological inoculation rate), as will be required to assess  
65 progress towards malaria elimination [5].  
66  
67 NIRS has been applied to analyse various entomological traits in malaria vectors including species [6, 7],  
68 age [6, 7], and more recently *Plasmodium* spp. infection [4, 8]. Light in the visible and near infrared region  
69 of the spectrum (wavelength 400-2500 nanometers) is passed through a mosquito's cephalothorax and an  
70 absorbance spectrum is collected instantly. The method is non-destructive and requires no consumables.  
71 As the external and internal biochemical composition of a mosquito changes so does its NIR absorbance  
72 spectrum. Consistent biochemical changes related to specific traits in mosquitoes can be used to develop  
73 predictive models. We have recently/previously shown that NIRS accurately predicted both oocyst and  
74 sporozoite infection in *Anopheles gambiae* s.s. mosquitoes that had been infected with laboratory-cultured  
75 *Plasmodium falciparum* (PfN54) gametocytes [4]. However, mosquitoes infected in the lab may be more  
76 alike and lack the natural variability present in mosquitoes infected in the wild and/or locally adapted  
77 laboratory strains, in addition the concentration of gametocytes ingested during a feed are considerably  
78 different between cultured and circulating gametocytes. For this reason, we designed a study to evaluate if

79 NIRS would be able to distinguish between uninfected mosquitoes, and mosquitoes that had been infected  
80 after ingesting blood from asymptomatic malaria carriers.

81

## 82 **METHODS**

### 83 *Study design*

84 The study aimed at testing the hypothesis that NIRS could distinguish between uninfected and sporozoite-  
85 infected mosquitoes that had been infected with circulating *P. falciparum* strains. The target number of  
86 gametocyte carriers was calculated considering the number of mosquitoes required to generate and test a  
87 NIRS calibration. Based on other NIRS studies on insect traits [6], 100 sporozoite-infected and 100  
88 uninfected mosquitoes were decided as minimum needed for testing (50-training dataset) and validating  
89 (50-test dataset) differences between the NIR spectra of the two categories, sporozoite-infected and  
90 uninfected. It was expected that the proportion of successful experiments, defined as at least one mosquito  
91 becoming infected after blood feeding would be around 40% [9], and that only 10-15% of engorged  
92 mosquitoes would become infected and survive 14 days post blood feeding [10]. Hence, it was concluded  
93 that a target number of 14 gametocyte carriers needed to be recruited for mosquito feeding assays in order  
94 to obtain sufficient number of infected mosquitoes to test and validate the NIRS method.

95

### 96 *Participant screening, recruitment and parasite detection*

97 Asymptomatic gametocyte carriers, 5 years-old and above, were identified through house-to-house visits in  
98 various sub-locations of Kilifi South along the Coast of Kenya (Figure 1) between May and September 2018.  
99 Information on recent malaria cases from the surrounding health facilities were used to target homesteads  
100 where a member had been recently treated for malaria. Participants were allowed ample time to review the  
101 details of the study in the participant information sheet, upon which written informed consent was  
102 obtained for screening of asymptomatic individuals residing in the study area. Parental consent was  
103 obtained for all children (5-17 years old) and informed assent was additionally obtained from children  
104 between 12 and 17 years old.

105

106 Screening for circulating gametocytes was done by finger prick to prepare thick and thin blood smears in  
107 the field which were transported the same day to KEMRI Wellcome Trust Research Programme (KWTRP)  
108 in Kilifi town. Screening was done three days a week and no more than 20 slides were taken per day to

109 KWTRP to be read by a trained microscopist. The thin blood films were fixed with 100% methanol and  
110 stained with 3% Giemsa stain for 45 minutes. Thick films were air-dried before staining. Thick films were  
111 first inspected, if there were more than 25 parasites per field on the thick film then the thin film was used  
112 for counting, otherwise the thick film was used. Parasite densities per mcl (microliter) of blood were  
113 calculated as the number of parasites per 200 white blood cells (WBCs) for thick films or per 500 red blood  
114 cells (RBCs) for thin films. The final parasite density was estimated assuming a WBC count of  $8 \times 10^9$  per  
115 Litre. The presence, parasite species, and densities of asexual and sexual parasites were recorded. A slide  
116 was considered negative for malaria infection after 100 fields of a thick film were read and no parasites  
117 were found. Parasite counts were determined by two independent microscopists and when necessary  
118 resolved by a third. Participants found with circulating asexual parasites were contacted by a field worker  
119 and referred to their local dispensary for treatment according to Kenyan national malaria treatment  
120 guidelines [11].

121  
122 Individuals found with circulating gametocytes were also contacted by a field worker and asked to visit the  
123 KWTRP the following morning for participation in mosquito feeding assays. Once at KWTRP, participants  
124 were asked about recent medical history and medication, and axillary temperature was measured. A thick  
125 and thin film was repeated to determine gametocytaemia on the day of the feeding assays. Participants  
126 were excluded if they had taken anti-parasitic medication or antibiotics in the past two weeks, had a  
127 temperature over 37.5 degrees Celsius, felt unwell, or were found to no longer have circulating  
128 gametocytes.

129  
130 *Mosquito colony maintenance*  
131 Mosquitoes from a colony of *An. gambiae* (Kilifi strain) were reared under standard insectary conditions  
132 ( $26 \pm 1^\circ\text{C}$ , 80% humidity, 12 hr light: 12 hr dark cycle) at the KWTRP. Larvae were fed on Tetramin tropical  
133 flakes and pupae were transferred into cages for adult emergence. Adult mosquitoes were fed *ad libitum* on  
134 10% glucose solution. Feeding assays were done using 2-5 days old mosquitoes previously starved of  
135 glucose and water for 8 h and which had never been given a blood meal (blood-naïve).

136  
137  
138

139 *Mosquito feeding assays*

140 A trained phlebotomist withdrew 4ml of venous blood through venipuncture for direct membrane feeding  
141 assay (DMFA). Adult participants (18 years or older) were also asked if they would consent to directly  
142 feeding 50 mosquitoes on their forearm for 20 minutes through direct feeding assay (DFA) . Participants  
143 could withdraw from either DMFA or DFA without need to provide justification.

144

145 DMFA was done at the KWTRP insectary using a water-jacketed membrane feeding system heated with a  
146 water bath kept between 38 degrees Celsius (C). The water-jacketed membrane feeding system was  
147 composed of a series of 4 mouth-blown glass feeders which were covered with Parafilm membrane on the  
148 bottom. The system was heated at least 30 minutes in advance of the DMFA to avoid temperature  
149 fluctuations in the glass feeders. All material used for the blood draw, including, syringe, butterfly and  
150 sample collection tube were kept at 38 degrees in a portable incubator and were only removed  
151 immediately before use. After blood was drawn, precautions were taken to not shake the sample tube and  
152 900 microliters of whole blood were transferred to each glass feeder using a warm sterile pipette. Serum  
153 replacement was not done as it was the intention of the study to replicate as best as possible what happens  
154 in the natural environment with mosquitoes feeding on whole blood with host serum. A total of 4 cups were  
155 used per DMFA, each containing approximately 50 to 75 starved, blood-naïve, female *An. gambiae* s.s.  
156 mosquitoes amounting to between 200 and 300 mosquitoes per DMFA participant.

157

158 Participants older than 18, who volunteered to take part in the DFA, fed an additional 50 mosquitoes on  
159 their arm for 20 minutes. During DFA there was no risk of disease transmission to the participant as all  
160 mosquitoes were insectary-reared and blood-naïve.

161

162 After the mosquito feeding assays, the participants were referred to the Out-Patient Department of the Kilifi  
163 District Hospital (KOPD) where they were seen by a clinical officer and treated according to the Kenyan  
164 national malaria treatment guidelines [11]. If the participant had agreed to the DFA they were also  
165 prescribed an anti-histamine cream to relieve any pruritus caused by the mosquito bites.

166

167

168

169 *NIRS spectra collection*

170 Blood-engorged mosquitoes were maintained in an access-controlled insectary for 14 days post blood-  
171 feeding to allow sporozoite development. After 14 days the mosquitoes were killed using chloroform  
172 vapors. Noticeably desiccated mosquitoes which had died earlier than day 14 were discarded. A near  
173 infrared (NIR) absorbance spectra was collected from each mosquito, without any further processing, using  
174 a Labspec 4i NIR spectrometer with an internal 18.6 W light source (ASD Inc, Longmont, CO) and ASD  
175 software RS3 and a 3.2 mm-diameter bifurcated fiber-optic probe which contained a single 600-micron  
176 collection fiber surrounded by six 600 micron illumination fibers. The probe was placed exactly 2.4 mm  
177 from a spectralon plate onto which the mosquitoes were placed for scanning. All mosquitoes were scanned  
178 on their cephalothorax and given a unique identifier.

179

180 *Sporozoite ELISA*

181 After scanning, each mosquito carcass was stored individually at -80 °C until circumsporozoite enzyme  
182 linked immunosorbent assay (CSP-ELISA) was done for detection of *Plasmodium falciparum*  
183 circumsporozoite protein (CSP) in each individual mosquito. Standard ELISA protocol was followed [12]  
184 using *P. falciparum* Sporozoite ELISA Reagent Kit, MRA-890, containing lyophilized monoclonal antibody,  
185 were obtained through BEI Resources, National Institute of Allergy and Infectious Diseases (NIAID) and  
186 National Institutes of Health (NIH). Three negative controls and three positive controls were included per  
187 assay. Positive controls were provided with the kit, whilst the cephalothorax of male mosquitoes (*A.*  
188 *gambiae* s.s. from the same insectary) were used as negative controls.

189

190 *Data analysis*

191 The results from the sporozoite ELISA were used to identify which individual mosquitoes had developed  
192 sporozoite infection. This information was specified to each respective NIR absorbance spectrum and  
193 added as a constituent to the predictive model. An equal number of spectra from uninfected and infected  
194 mosquitoes were randomly selected to explore differences in the NIR spectra between infected and  
195 uninfected mosquitoes. Leave-one-out cross validations (LOOCV) using partial least square (PLS)  
196 regressions in GRAMS Plus/IQ software (Thermo Galactic, Salem, NH) were used to analyze the two groups  
197 of spectra, and evaluate the predictive performance of the model.

198



199 LOOCV is a *k-fold* cross validation, with *k* equal to the total number (*n*) of spectra in a training dataset. That  
200 means that *n* separate times, the function approximator is trained on all the spectra except for one  
201 spectrum which is left-out. The algorithm then predicts the *left-out* spectra with the remaining spectra (*k*-  
202 1), which, in combination, become the training sample. The out-of-sample predictive accuracy of the model  
203 is assessed by estimating the predicted residual sum of squares (PRESS) and the number of latent factors  
204 needed to explain the variation between spectra groups.  $R^2$  and predicted  $R^2$  are evaluated as measures of  
205 in-sample explanatory power. If a model performs well at *self-prediction*, a training dataset is then used to  
206 develop a calibration file to test the predictive ability of the model on an independent set of spectra (test  
207 dataset).

208

## 209 **RESULTS**

### 210 *Parasitological survey*

211 A total of 179 adults (18 years or above) and 120 children (5-17 years old) were screened from various  
212 sublocations of Kilifi South in Kilifi County (Figure 1). The highest number of parasite infected individuals  
213 were found in Junju, Kolewa and Mapawa sub-locations (Table 1). From the 299 screened participants,  
214 seventy-four (74, 24.8%) were found with circulating asexual parasites, and 16 (5.4%) with *P. falciparum*  
215 gametocyte stages (Figure 2). In eleven individuals (3.7%) both asexual and sexual parasites were found in  
216 circulation, of which ten were positive for *P. falciparum* and 1 for *Plasmodium ovale*.

217

218 Parasite prevalence decreased with age (Figure 3) (Table 2). Older adults (40-49-year-old) were the least  
219 likely to be found with circulating parasites, only 5% (2/44) had asexual stage parasites and 2% (1/44)  
220 sexual stage parasite in circulation. The highest parasite prevalence was found in children 5-9 years old;  
221 36% (16/45) of the children screened were positive for asexual stage parasites, and 11% (5/45) were  
222 positive for gametocytes. Older children and adolescents (10-19 years old) had only slightly lower parasite  
223 prevalence than the younger age group, 32% (28/87) of the children were found with asexual parasites and  
224 6% (5/87) with circulating gametocytes. Young (20-29 years old) and middle-aged adults (30-39 years old)  
225 had comparable parasite prevalence with respectively 24% (16/66) and 21% (12/57) found with asexual  
226 parasite stages, and 6% (4/66) and 4% (2/57) found with sexual parasite stages.

227

228 Asexual parasite densities per mcl was highest in the children 5-9 years old [Median=600; IQR= (160-  
 229 1640], with highest parasite densities recorded in an 8-year-old child (31'040 parasites/mcl). Older  
 230 children and young adults had lower median parasite densities compared to the younger children, whilst  
 231 older adults (40-49 years old) had lowest parasite densities (Median=200; IQR= (120-280)].

232  
 233 Fifteen gametocyte carriers, eight adults and seven children, were recruited and invited to participate in  
 234 mosquito feeding assays. One child withdrew before sample could be collected due to fear of needles, and  
 235 one adult participant consented to the blood draw for DMFA but withdrew from participating in the direct  
 236 feeding assay because of beliefs in witchcraft. DMFA was performed with blood of all 14 participants, and  
 237 DFA was performed on 7 of the adult participants (Table 2).

238  
 239 Table 1 – Number of participants screened and found to have circulating *Plasmodium spp* parasites in  
 240 sublocations of Kilifi South, Kilifi County, Kenya.

| Village             | Asexual parasites, n/N (%) | Gametocytes, n/N (%) | Total screened |
|---------------------|----------------------------|----------------------|----------------|
| Gongoni             | 8/61 (13.1%)               | 2/61 (3.3%)          | 61             |
| Junju               | 16/66 (24.2%)              | 4/66 (6.1%)          | 66             |
| Kolewa <sup>1</sup> | 21/58 (36.2%)              | 3/58 (5.2%)          | 58             |
| Mapawa              | 24/88 (27.3%)              | 5/88 (5.7%)          | 88             |
| Mwembe Tsungu       | 4/17 (23.5%)               | 3/17 (17.6%)         | 17             |
| Sirini              | 0/7 (0%)                   | 0/7 (0%)             | 7              |
| Forozani            | 0/1 (0%)                   | 0/1 (0%)             | 1              |
| Vipingo             | 1/1 (100%)                 | 0/1 (0%)             | 1              |
| <b>Total</b>        | <b>74/299 (24.8%)</b>      | <b>17/299 (5.7%)</b> | <b>299</b>     |

241 <sup>1</sup> Village where one participant was found with circulating *Plasmodium ovale* parasites. Shown in parenthesis  
 242 are percent positive per village.

243 Table 2 – Number of participants by age group screened for asexual (A) and sexual stage (B) *Plasmodium spp.* parasites. Median parasitemia per mcl and  
 244 interquartile range (based on number of parasites counted per 200 WBC assuming 8000 WBC/mcl), minimum and maximum parasites per mcl and number of  
 245 participants recruited for direct membrane feeding assay (DMFA) and direct feeding assay (DFA).

| <b>A – Asexual parasites</b> |                                     |                                    |                                     |                        |                                   |             |                |
|------------------------------|-------------------------------------|------------------------------------|-------------------------------------|------------------------|-----------------------------------|-------------|----------------|
| <b>Age</b>                   | <b>No. participants<sup>1</sup></b> | <b>Asexual parasite prevalence</b> | <b>Median parasites / mcl (IQR)</b> | <b>Min - Max / mcl</b> |                                   |             |                |
| <b>5-9</b>                   | 16/45                               | 0.36                               | 600 (160 – 1'640)                   | 80 – 31'040            |                                   |             |                |
| <b>10-19</b>                 | 28/87                               | 0.32                               | 280 (120 - 940)                     | 80 – 26'560            |                                   |             |                |
| <b>20-29</b>                 | 16/66                               | 0.24                               | 280 (140 – 1'140)                   | 40 – 9'160             |                                   |             |                |
| <b>30-39</b>                 | 12/57                               | 0.21                               | 220 (140 – 700)                     | 80 – 5'760             |                                   |             |                |
| <b>40-49</b>                 | 2/44                                | 0.05                               | 200 (120 – 280)                     | 120 - 280              |                                   |             |                |
| <b>B – Gametocytes</b>       |                                     |                                    |                                     |                        |                                   |             |                |
| <b>Age</b>                   | <b>No. participants</b>             | <b>Gametocyte prevalence</b>       | <b>Median parasites / mcl (IQR)</b> | <b>Min - Max / mcl</b> | <b>No. participants recruited</b> | <b>DMFA</b> | <b>DFA</b>     |
| <b>5-9</b>                   | 5/45                                | 0.11                               | 280 (160 – 280)                     | 40 – 1'240             | 2 <sup>2,3,4</sup>                | 2           | 0              |
| <b>10-19</b>                 | 5/87                                | 0.06                               | 80 (80 – 80)                        | 40 - 80                | 4                                 | 4           | 1 <sup>5</sup> |
| <b>20-29</b>                 | 4/66                                | 0.06                               | 300 (240 – 360)                     | 200 - 400              | 4                                 | 4           | 4              |
| <b>30-39</b>                 | 2/57                                | 0.04                               | 520 (80 – 960)                      | 80 - 960               | 2                                 | 2           | 1 <sup>6</sup> |
| <b>40-49</b>                 | 1/44                                | 0.02                               | 160 (160 – 160)                     | 160 - 160              | 1                                 | 1           | 1              |

246 <sup>1</sup> Number of participants found with circulating parasites/total participants screened

247 <sup>2</sup> One individual withdrew participation out of fear of needles.

248 <sup>3</sup> One gametocyte-positive individual had a *Plasmodium. ovale* infection and so did not meet the study's inclusion criteria.

249 <sup>4</sup> One individual was randomly excluded because the target number of 14 participants had been reached.

250 <sup>5</sup> DFA was performed on a 19-year old volunteer.

251 <sup>6</sup> One of the adult participants consented to DMFA but not to DFA for fear of witchcraft.

252 *Infectivity to mosquitoes*

253 Of the fourteen asymptomatic gametocyte carriers that were recruited for mosquito feeding assays, 9  
 254 resulted in successful sporozoite infections confirmed by CSP ELISA (Table 3). High gametocyte densities  
 255 did not necessarily result in high sporozoite positivity rate (Figure 4). For instance, the highest mosquito  
 256 infection rate (47.0% infection by DFA and 17.6% by DMFA) resulted from a participant with low  
 257 gametocyte densities (80 gametocytes/mcl). Concurrent DMFA and DFA were performed on 7 adult  
 258 participants, of which 4 participants were able to infect mosquitoes. Unfortunately, mosquitoes fed by DFA  
 259 from one participant escaped and had to be killed before reaching 14-days post feeding to maintain  
 260 biosecurity. Overall mosquito infection rate by DMFA was 4.9%. Concurrent DMFA and DFA, performed on  
 261 the same participant, resulted in 11.5% and 23.7% infection rates, respectively.

262

263 Table 3 – Infectivity of individual participants based on feeding assay and positivity by CSP-ELISA

| Participant          | Age | Gametocytes per mcl | DMFA <sup>1</sup><br>% (n/N) | DFA <sup>1</sup><br>% (n/N) | Total <sup>1</sup><br>% (n/N) |
|----------------------|-----|---------------------|------------------------------|-----------------------------|-------------------------------|
| Adult 1              | 42  | 160                 | 0.0% (0/80)                  | 12.5% (3/24)                | 2.9% (3/104)                  |
| Adult 2              | 23  | 200                 | 1.4% (1/74)                  | 7.1% (2/28)                 | 2.9% (3/102)                  |
| Adult 3              | 19  | 80                  | 17.6% (15/85)                | 47.0% (8/17)                | 22.6% (23/102)                |
| Adult 4 <sup>2</sup> | 20  | 400                 | 26.9% (66/245)               | 28.0% (7/25)                | 27% (73/270)                  |
| Adult 5 <sup>3</sup> | 31  | 960                 | 17.0% (26/153)               | -                           | 17.0% (26/153)                |
| Adult 6              | 33  | 80                  | 0.7% (1/141)                 | -                           | 0.7% (1/141)                  |
| Adult 7              | 22  | 320                 | 0% (0/61)                    | 0% (0/15)                   | 0% (0/76)                     |
| Adult 8              | 20  | 280                 | 0% (0/137)                   | 0% (0/33)                   | 0% (0/170)                    |
| Child 1              | 10  | 80                  | 2.1% (2/94)                  | -                           | 2.1% (2/94)                   |
| Child 2              | 5   | 40                  | 0.5% (1/199)                 | -                           | 0.5% (1/199)                  |
| Child 3              | 17  | 40                  | 2.6% (2/77)                  | -                           | 2.6% (2/77)                   |
| Child 4              | 7   | 160                 | 0% (0/240)                   | -                           | 0% (0/240)                    |
| Child 5              | 15  | 80                  | 0% (0/66)                    | -                           | 0% (0/66)                     |
| Child 6              | 12  | 80                  | 0% (0/87)                    | -                           | 0% (0/87)                     |
| <b>Total</b>         |     |                     | 4.9% (114/1739)              | 15.8% (20/142)              | 7.1% (134/1881)               |

264 <sup>1</sup> Percent positive of mosquitoes by CSP-ELISA based on mosquito feeding assay

265 <sup>2</sup> All mosquitoes fed by DFA on this participant were killed before reaching 14 days-old to maintain bio-  
 266 security.

267 <sup>3</sup> Withdrew participation from DFA over fear of witchcraft. *Leave-one-out cross validations (LOOCV)*

268

269 Overall, 1,881 individual NIR absorbance spectra (500-2400 nm) from potential sporozoite-infected  
270 mosquitoes were taken, of which 1739 mosquitoes had been fed via DMFA and 142 via DFA. A total of 134  
271 NIRS absorbance spectra corresponding to sporozoite-infected mosquitoes were obtained. Three training  
272 datasets were analyzed using PLS through LOOCV on Grams Plus/ IQ software for the development of a  
273 predictive model to distinguish between sporozoite-infected and uninfected mosquitoes.

274  
275 In the first analysis, a pool of 134 spectra from sporozoite-infected mosquitoes were randomly divided in  
276 two, half of the spectra were assigned to a training dataset (67) and the other half to a test dataset (67) to  
277 be used for validating the model if it showed good self-predictive ability. Each spectrum from a sporozoite-  
278 infected mosquito was matched with a spectrum corresponding to an uninfected mosquito from the same  
279 experimental feed. Matching was done to reduce confounding effects such as parasite load and participant  
280 immunity as the assays were done with whole blood. Thus, a total of 67 spectra corresponding to  
281 sporozoite-infected mosquitoes were matched with 67 spectra from uninfected mosquitoes (134 spectra:  
282 67 uninfected/67 sporozoite-infected). The LOOCV showed poor model predictive ability, ( $R^2 = 0.029$ ). the  
283 variation between sporozoite-infected spectra and uninfected spectra could not be explained by the  
284 mosquito's infectious status (see Analysis 1 in supplementary file).

285  
286 A second analysis was performed to ascertain that the two NIR spectra categories were not distinct by  
287 increasing the number of spectra in the training dataset. A second training dataset included all the spectra  
288 from sporozoite-infected mosquitoes (134) and was matched with respective uninfected mosquitoes (134  
289 sporozoite-infected/134 uninfected). A second LOOCV was performed using the larger training dataset  
290 (268 spectra: 134 uninfected/134 sporozoite-infected). The model was not improved ( $R^2 = 0.00000009$ )  
291 and remained unable to differentiate the spectra from the two mosquito groups (see analysis 2 in  
292 supplementary file).

293  
294 Uninfected mosquitoes in the first and second analysis had been matched to infected ones from the same  
295 experimental feed, consequently it was possible that the uninfected mosquitoes had been exposed to  
296 infectious gametocytes but had not developed sporozoite infection. Hence, a third analysis was performed  
297 to rule out the possibility that an arthropod immune response had affected the NIR spectra profiles of the  
298 uninfected mosquitoes. A third training dataset was composed of 99 sporozoite-infected mosquitoes from

299 the three participants with highest experimental infection rates (Adult 1, 3, 4), and 99 uninfected  
300 mosquitoes from three unsuccessful experiments (i.e. mosquito feeding experiments that did not lead to at  
301 least one infected mosquito). An LOOCV was performed to give information on the prediction ability of the  
302 model using a training dataset composed of 198 spectra (99 sporozoite-infected/99 uninfected from  
303 unsuccessful experiments). Yet again, the PLS model was unable to distinguish between the two spectra  
304 groups ( $R^2 = 0.049$ ). (see Analysis 3 in supplementary file).

305  
306 A calibration could not be generated based on any of the training datasets as the variation between the two  
307 groups of spectra (sporozoite-infected mosquitoes Vs uninfected mosquitoes) could not be explained by  
308 any of the models using PLS.

309

## 310 **DISCUSSION**

311 The present study shows that mosquito transmission studies using DMFA and DFA can be readily  
312 conducted in Kilifi by targeting an area known as a malaria hotspot. Screening was targeted to areas where  
313 malaria cases had recently been reported at the health care facility which may have overestimated the  
314 prevalence of malaria in the area compared to other published studies from the same area [13]. The  
315 targeted screening approach proved to be a successful strategy for identifying gametocyte carriers in the  
316 community.

317

318 The study achieved 9 out of 14 successful experiments, defined as at least one mosquito becoming infected  
319 after blood feeding based on the detection of sporozoites in each individual mosquito by ELISA. The highest  
320 infection rate resulted from a participant who had relatively low gametocytemia (Table 3). It is known that  
321 mosquito infectivity to gametocytes is dependent of multiple factors besides from gametocyte density,  
322 including the adequate ratio of male to female parasites, their level of maturity as well as mosquito  
323 microbiome and immunity [14]. In the present experiment, mosquitoes were all from the same strain and  
324 reared in the same insectary conditions therefore had plausible similar microbiome and immunity.

325

326 DFA consistently produced higher infection rates. This is in line with other studies which have compared  
327 the two methods [9, 10]. Gametocytes are known to sequester in the microvasculature, thus venous blood  
328 used for DMFA may have contained fewer parasites compared to capillary blood. It is also possible that DFA

329 was more successful because unlike DMFA the method does not require blood handling during  
330 venipuncture which may lead to exflagellation of the male gametocytes and loss of infectiousness.

331

332 The three training datasets used to investigate if a PLS predictive model could be generated to predict  
333 sporozoite infections status in mosquitoes demonstrated poor out-of-sample predictive accuracy. The  
334 models were unable to satisfactorily predict the left-out spectra ( $k-1$ ). The PRESS showed no latent factor  
335 could be identified to explain the variation between spectra groups (sporozoite-infected mosquitoes Vs  
336 uninfected mosquitoes) (see supplementary file).  $R^2$  and predicted  $R^2$  values for three models evaluated  
337 were very low indicating its inadequacy to explain the variation between the constituents. Given the poor  
338 self-explanatory ability of the three PLS models, the present study was unable to generate a calibration for  
339 distinguishing sporozoite infection status of *A. gambiae* s.s. mosquitoes.

340

341 The present findings are at variance with a previous study which showed that PLS models based on the NIR  
342 absorbance spectra profile, could accurately predict both oocyst and sporozoite infection status of *A.*  
343 *gambiae* s.s. mosquitoes infected with laboratory-cultured *P. falciparum* (PfN54) parasites [4]. Differences  
344 between the two studies may explain the conflicting results.

345

346 In the previous study, mosquitoes were infected with lab-reared gametocytes through standard membrane  
347 feeding assays (SMFA) using higher parasite concentrations than what is usually found in a human  
348 gametocyte carrier. It is likely that mosquitoes in the present study were, in comparison, exposed to a much  
349 smaller number of parasites which more closely represents natural infections in nature Findings from the  
350 previous study also concluded that the prediction accuracy of the model dropped when mosquitoes had  
351 reduced infection loads (measured as number of parasite genomes). A limitation of the current study is that  
352 parasite quantification in the mosquito was not performed through qPCR (quantitative polymerase chain  
353 reaction). ELISA was chosen as reference test as it is the assay of choice for field entomologists to identify  
354 sporozoite-infected mosquitoes and measure sporozoite rates.

355

356 The training datasets of Analysis 1 and 2 included spectra of uninfected mosquitoes that had been matched  
357 with spectra of sporozoite-infected mosquitoes fed on the same infectious blood meal. These uninfected  
358 mosquitoes were exposed to an infectious blood meal but had not developed sporozoites. It is possible that

359 during feeding these mosquitoes did not pick-up a male and female gametocyte for subsequent  
360 differentiation into gametes and mating inside the mosquito gut, or alternatively they may have blocked  
361 infection through an immune response. In comparison, the predictive model of the previous study [4] was  
362 characterized by uninfected mosquitoes that had been fed neutralized gametocytes, which are unlikely to  
363 trigger an immune response in the arthropod vector. To evaluate if the mosquito's immune response had  
364 affected the NIR profile of the uninfected mosquitoes Analysis 3 was done whereby spectra were no longer  
365 matched by experimental feed. In Analysis 3, spectra from sporozoite-infected mosquitoes were compared  
366 to spectra from uninfected mosquitoes fed during unsuccessful experiments (i.e. an experimental feed  
367 where none of the fed mosquitoes developed sporozoite infection). Yet again, the predictive ability of the  
368 model remained poor and it is unlikely that arthropod immune response significantly affected the NIR  
369 spectra profile of the mosquitoes.

370  
371 PLS regression is the most widely used approach for developing predictive models to distinguish between  
372 entomological parameters such as mosquito age, species as well as *Wolbachia* infection [6, 7, 15]. Other  
373 machine learning methods, such as artificial neural networks have been recently suggested as alternative  
374 analytical approaches [16, 17] and it is possible that these may improve the prediction ability of models to  
375 distinguish between NIR spectra of infected and uninfected mosquitoes.

376

## 377 **CONCLUSIONS**

378 While the findings presented here were unable to reproduce and replicate previous finding [4],thes results  
379 are important as the will inform future studies seeking novel high-throughput methods for parasite  
380 detection in mosquitoes. The results of this study were not consistent with previous published research on  
381 NIRS for detection of sporozoite infection in the same mosquito species thought different strains, and this  
382 may be explained by the context of the experiments. Further research may clarify the discrepancy in the  
383 findings. It is essential that new technologies for identifying infections in mosquitoes are assessed and  
384 developed in the field setting at an early stage as this is their primary application.

385

386

387



388 **LIST OF ABBREVIATIONS**

389 CSP ELISA – Circumsporozoite Enzyme Linked Immunosorbent Assay

390 DMFA – Direct Membrane Feeding Assay

391 DFA- Direct Feeding Assay

392 KWTRP- Kenya Medical Research Institute, Wellcome Trust Research Programme

393 KOPD- Kilifi Out-patient Department

394 NIRS – Near infrared spectroscopy

395 LOOCV – Leave-one-out Cross Validations

396 PLS – Partial Least Squares

397 WBC- White Blood Cells

398

399 **ETHICS APPROVAL**

400 Individual consent was obtained before each screening, parental consent was obtained for minors (5-17

401 years old) and assent was obtained for children between 12 and 17 years old. Ethical approval

402 (KEMRI/SERU/CGMR-C/082/3523) was obtained from SERU-KEMRI (Scientific and Ethics Review Unit of

403 the Kenya Medical Research Institute).

404

405 **CONSENT FOR PUBLICATION**

406 Not applicable.

407

408 **AVAILABILITY OF DATA AND MATERIAL**

409 All the data necessary to interpret and replicate the finding on this paper have been made publicly available

410 on the data repository Harvard dataverse [18]. This includes anonymized screening results, as well as

411 DMFA and DFA assay results; NIR spectra of all the specimens (spc files) with specification to whether they  
412 correspond to sporozoite-infected or uninfected mosquitoes.

413

#### 414 **COMPETING INTERESTS**

415 The authors declare no competing interests of financial or non-financial nature. Mention of trade names or  
416 commercial products in this publication is solely for the purpose of providing specific information and does  
417 not imply recommendation or endorsement by the U.S. Department of Agriculture. USDA is an equal  
418 opportunity provider and employer.

419

#### 420 **FUNDING**

421 The authors acknowledge the Swiss National Foundation of Science for the funding provided to MFM  
422 through the Marie Heim-Voegtlin fellowship scheme (PMPDP3-164444 and PMPDP3\_181590/1) and  
423 Initiative to Develop African Leaders Program (IDeAL) for funding MWs post graduate diploma.

424

#### 425 **AUTHORS CONTRIBUTIONS**

426 MFM drafted the manuscript and designed the experiment with input from PB, FD and MCK. MFM led the  
427 study, including obtaining study ethics approvals, participant screening and recruitment, mosquito feeding  
428 assays, data collection and analysis. FM and JK performed the CSP ELISA assays. MFM and MW scanned the  
429 mosquitoes and collected the NIR data. JW managed the team of field workers who collected the blood  
430 smears for screening. RM read all the study blood smears. MM and FM maintained the insectary and  
431 prepared mosquitoes for the experimental assays. MH advised on all clinical aspects of the study and  
432 ensured clinical care was provided. All authors read and commented on drafts of the manuscript and  
433 approved the final version for publication.

434

#### 435 **ACKNOWLEDGEMENTS**

436 We would like to thank the medical officers Joseph Weya and Kenneth Kiogora for attending to the  
437 participants at the KOPD; the KWTRP field worker team; Christopher Nyundo for assisting with a map of  
438 the study site; the KEMRI community representatives; and the KEMRI community liaison group (CLG).  
439 Mostly, the authors thank the communities of Junju and Pingilikani for their participation. In addition, we

440 acknowledge, the following reagent was obtained through BEI Resources, NIAID, NIH: *Plasmodium*  
441 *falciparum* Sporozoite ELISA Reagent Kit, MRA-890, contributed by Robert A. Wirtz

442

443

#### 444 REFERENCES

- 445 1. WHO: **World Malaria Report**. World Health Organization: Geneva, Switzerland; 2019.
- 446 2. **malERA: An updated research agenda for insecticide and drug resistance in malaria elimination and**  
447 **eradication**. *PLoS Med* 2017, **14**:e1002450.
- 448 3. Burkot TR, Zavala F, Gwadz RW, Collins FH, Nussenzweig RS, Roberts DR: **Identification of malaria-**  
449 **infected mosquitoes by a two-site enzyme-linked immunosorbent assay**. *Am J Trop Med Hyg* 1984,  
450 **33**:227-231.
- 451 4. Maia MF, Kapulu M, Muthui M, Wagah MG, Ferguson HM, Dowell FE, Baldini F, Ranford-Cartwright L:  
452 **Detection of *Plasmodium falciparum* infected *Anopheles gambiae* using near-infrared spectroscopy**.  
453 *Malar J* 2019, **18**:85.
- 454 5. Tusting LS, Bousema T, Smith DL, Drakeley C: **Measuring changes in *Plasmodium falciparum***  
455 **transmission: precision, accuracy and costs of metrics**. *Adv Parasitol* 2014, **84**:151-208.
- 456 6. Mayagaya VS, Michel K, Benedict MQ, Killeen GF, Wirtz RA, Ferguson HM, Dowell FE: **Non-destructive**  
457 **determination of age and species of *Anopheles gambiae* s.l. using near-infrared spectroscopy**. *Am J*  
458 *Trop Med Hyg* 2009, **81**:622-630.
- 459 7. Sikulu M, Killeen GF, Hugo LE, Ryan PA, Dowell KM, Wirtz RA, Moore SJ, Dowell FE: **Near-infrared**  
460 **spectroscopy as a complementary age grading and species identification tool for African malaria**  
461 **vectors**. *Parasit Vectors* 2010, **3**:49.
- 462 8. Esperança PM, Blagborough AM, Da DF, Dowell FE, Churcher TS: **Detection of *Plasmodium berghei***  
463 **infected *Anopheles stephensi* using near-infrared spectroscopy**. *Parasit Vectors* 2018, **11**:377.
- 464 9. Bousema T, Dinglasan RR, Morlais I, Gouagna LC, van Warmerdam T, Awono-Ambene PH, Bonnet S,  
465 Diallo M, Coulibaly M, Tchuinkam T, et al: **Mosquito feeding assays to determine the infectiousness of**  
466 **naturally infected *Plasmodium falciparum* gametocyte carriers**. *PLoS ONE* 2012, **7**:e42821.

- 467 10. Diallo M, Toure AM, Traore SF, Niare O, Kassambara L, Konare A, Coulibaly M, Bagayogo M, Beier JC,  
468 Sakai RK, et al: **Evaluation and optimization of membrane feeding compared to direct feeding as an**  
469 **assay for infectivity.** *Malar J* 2008, **7**:248.
- 470 11. Kenya MoH: **National Guidelines for the diagnosis, treatment and prevention of malaria in Kenya.** 5th  
471 Edition edition. Nairobi, Kenya: National Malaria Control Program; 2016.
- 472 12. Beier MS, Schwartz IK, Beier JC, Perkins PV, Onyango F, Koros JK, Campbell GH, Andrysiak PM,  
473 Brandling-Bennett AD: **Identification of malaria species by ELISA in sporozoite and oocyst infected**  
474 ***Anopheles* from western Kenya.** *Am J Trop Med Hyg* 1988, **39**:323-327.
- 475 13. Muthui MK, Mogeni P, Mwai K, Nyundo C, Macharia A, Williams TN, Nyangweso G, Wambua J, Mwangi  
476 D, Marsh K, et al: **Gametocyte carriage in an era of changing malaria epidemiology: A 19-year analysis**  
477 **of a malaria longitudinal cohort.** *Wellcome Open Res* 2019, **4**.
- 478 14. Sinden RE, Blagborough AM, Churcher T, Ramakrishnan C, Biswas S, Delves MJ: **The design and**  
479 **interpretation of laboratory assays measuring mosquito transmission of *Plasmodium*.** *Trends Parasitol*  
480 2012, **28**:457-465.
- 481 15. Sikulu-Lord MT, Maia MF, Milali MP, Henry M, Mkandawile G, Kho EA, Wirtz RA, Hugo LE, Dowell FE,  
482 Devine GJ: **Rapid and Non-destructive Detection and Identification of Two Strains of *Wolbachia* in**  
483 ***Aedes aegypti* by Near-Infrared Spectroscopy.** *PLoS Negl Trop Dis* 2016, **10**:e0004759.
- 484 16. Milali MP, Sikulu-Lord MT, Kiware SS, Dowell FE, Corliss GF, Povinelli RJ: **Age grading *An. gambiae* and**  
485 ***An. arabiensis* using near infrared spectra and artificial neural networks.** *PLoS One* 2019, **14**:e0209451.
- 486 17. Milali MP, Kiware SS, Govella NJ, Okumu F, Bansal N, Bozdog S, Charlwood JD, Maia MF, Ogoma SB,  
487 Dowell FE, et al: **An autoencoder and artificial neural network-based method to estimate parity status**  
488 **of wild mosquitoes from near-infrared spectra.** *PLoS One* 2020, **15**.
- 489 18. Maia MF, Wagah MG, Karisa J, Mure F, Mwakesi R, Muturi M, Wambua J, Hamaluba M, Dowell F, Bejon  
490 P, Kapulu MC: **Data for: Evaluation of near infrared spectroscopy for sporozoite detection in**  
491 **mosquitoes infected with wild-strain parasites from asymptomatic gametocyte carriers in Kilifi Kenya.**  
492 <https://doi.org/10.7910/DVN/IVFTLB>, Harvard Dataverse, V1. 2020.

493

494

495

496 **ADDITIONAL FILES**

497 Additional file 1.docx: GRAMS output figures and table describing the mosquitoes used in the three training  
498 datasets by participant and infection status (determined by Csp-ELISA).

499

500 **FIGURE LEGENDS**

501

502 **Figure 1** – Map of the study area showing the location of the villages where participants were screened for  
503 malaria parasites between 28th May and 18<sup>th</sup> September 2018.

504

505 **Figure 2** – Flow chart showing number of adult and child participants that were screened, and recruited for  
506 direct membrane feeding assay (DMFA) and direct feeding assay (DFA).

507

508 **Figure 3** – Log transformed asexual (left y axis) and sexual parasites (right y axis) per mcl by age group (x  
509 axis) from the parasitological survey done in Kilifi South, Kenya between 28th May and 18<sup>th</sup> September 2018.

510

511 **Figure 4** – Log transformed gametocytes per mcl (x axis) and percentage of mosquitoes that became  
512 sporozoite positive (positivity rate) (y axis) after DMFA and DFA. Fitted predicted positivity rate and 95%  
513 confidence interval (CI).

514

515

Kilifi HDSS

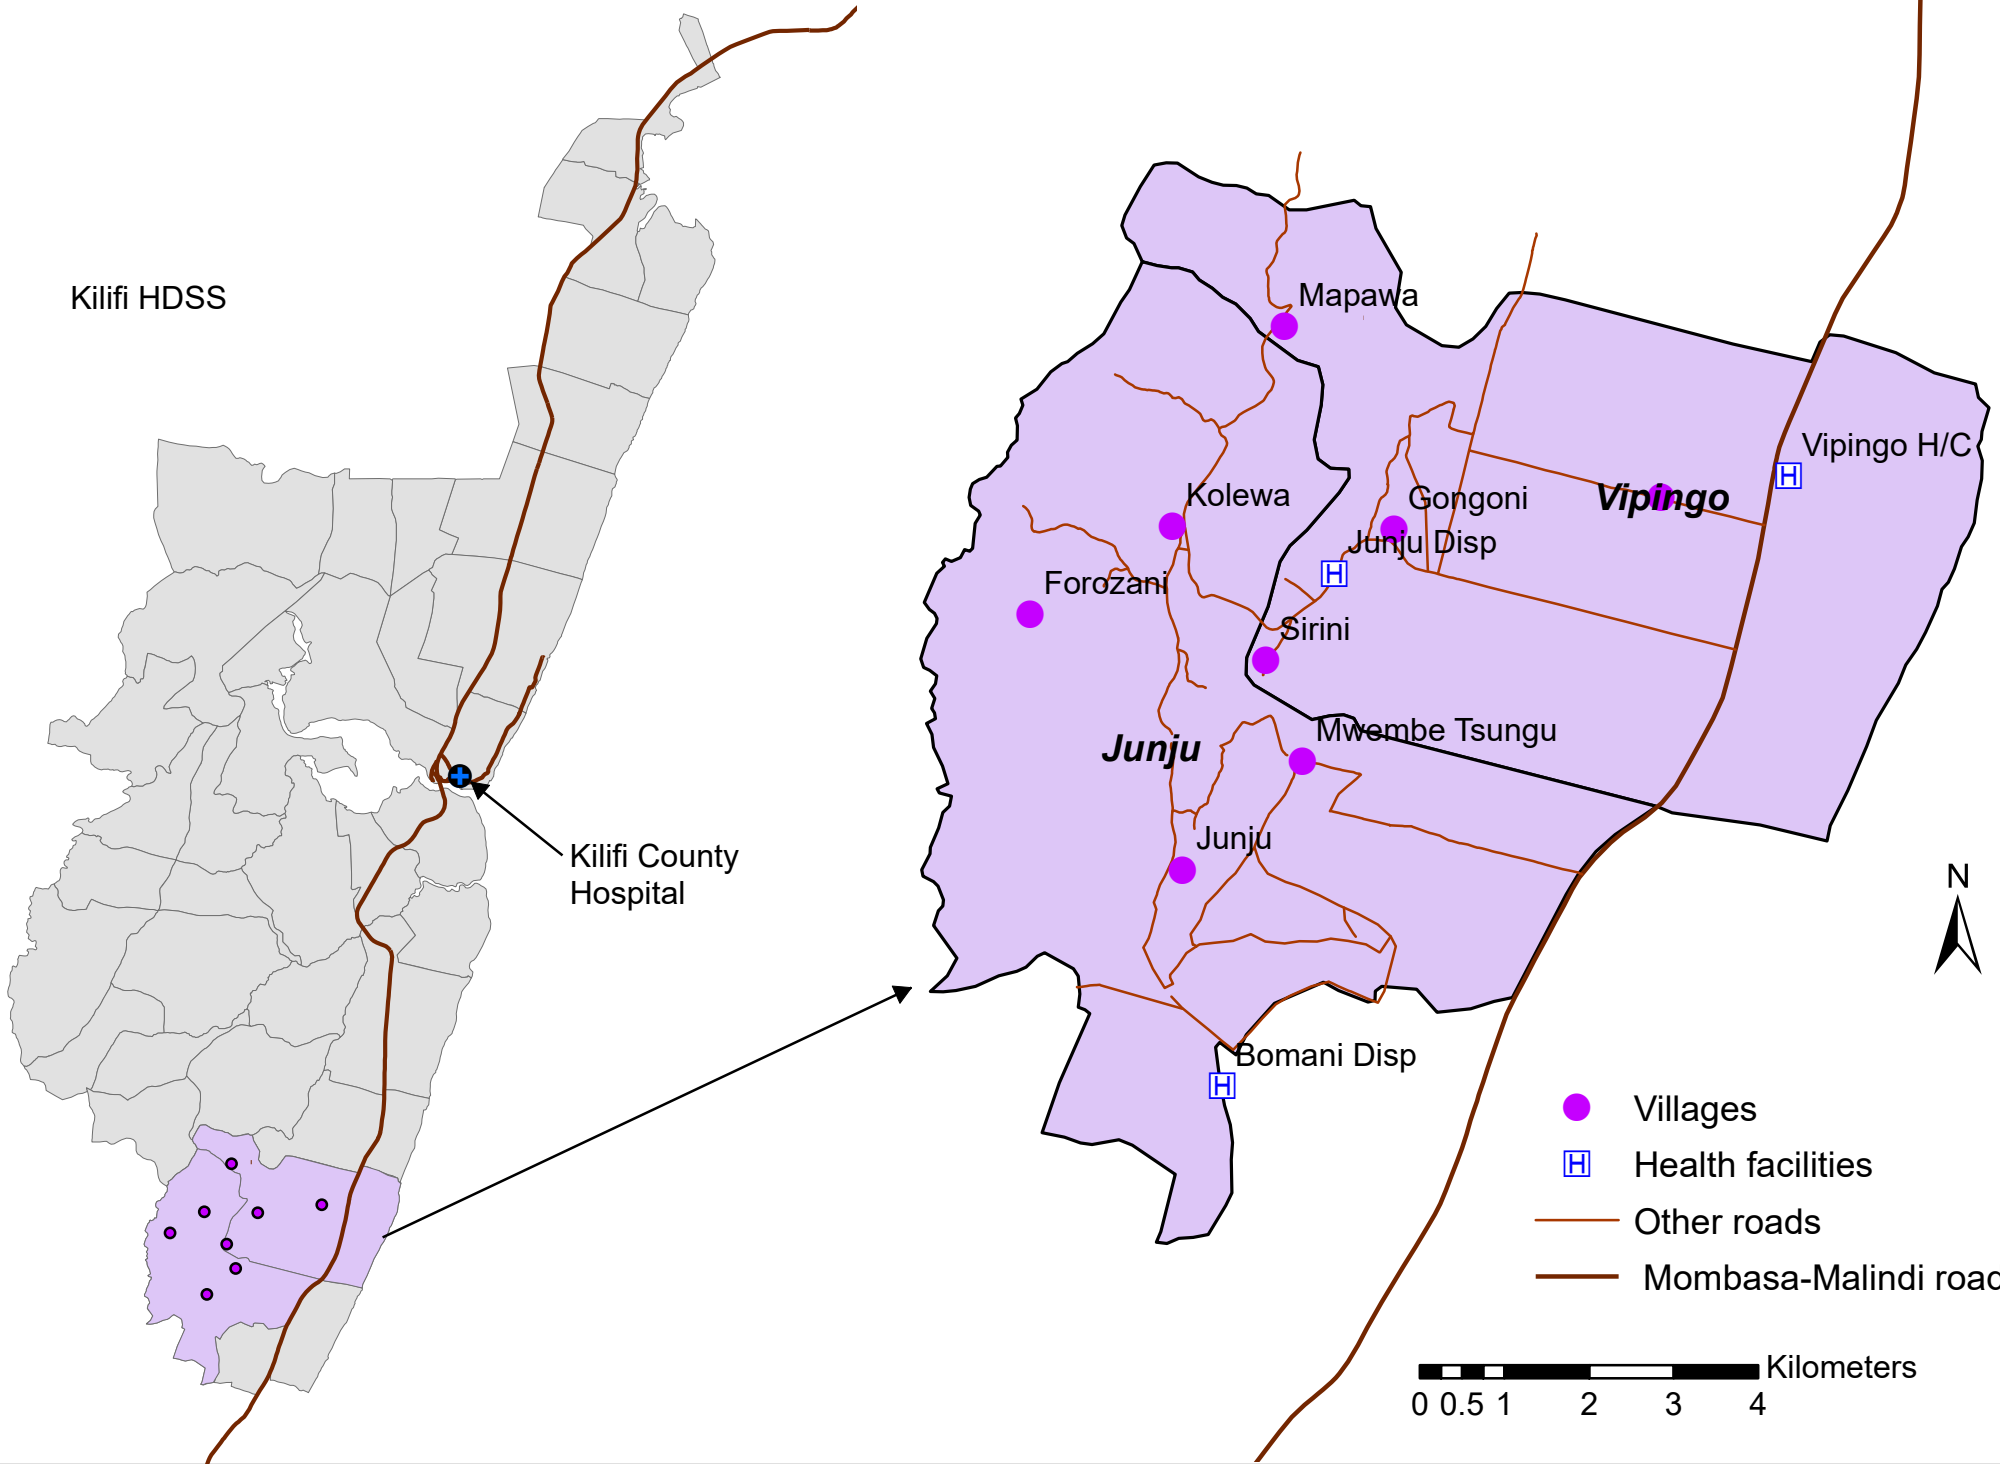

Kilifi County Hospital

**Junju**

**Vipingo**

- Villages
- Health facilities
- Other roads
- Mombasa-Malindi road

0 0.5 1 2 3 4 Kilometers

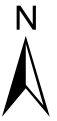

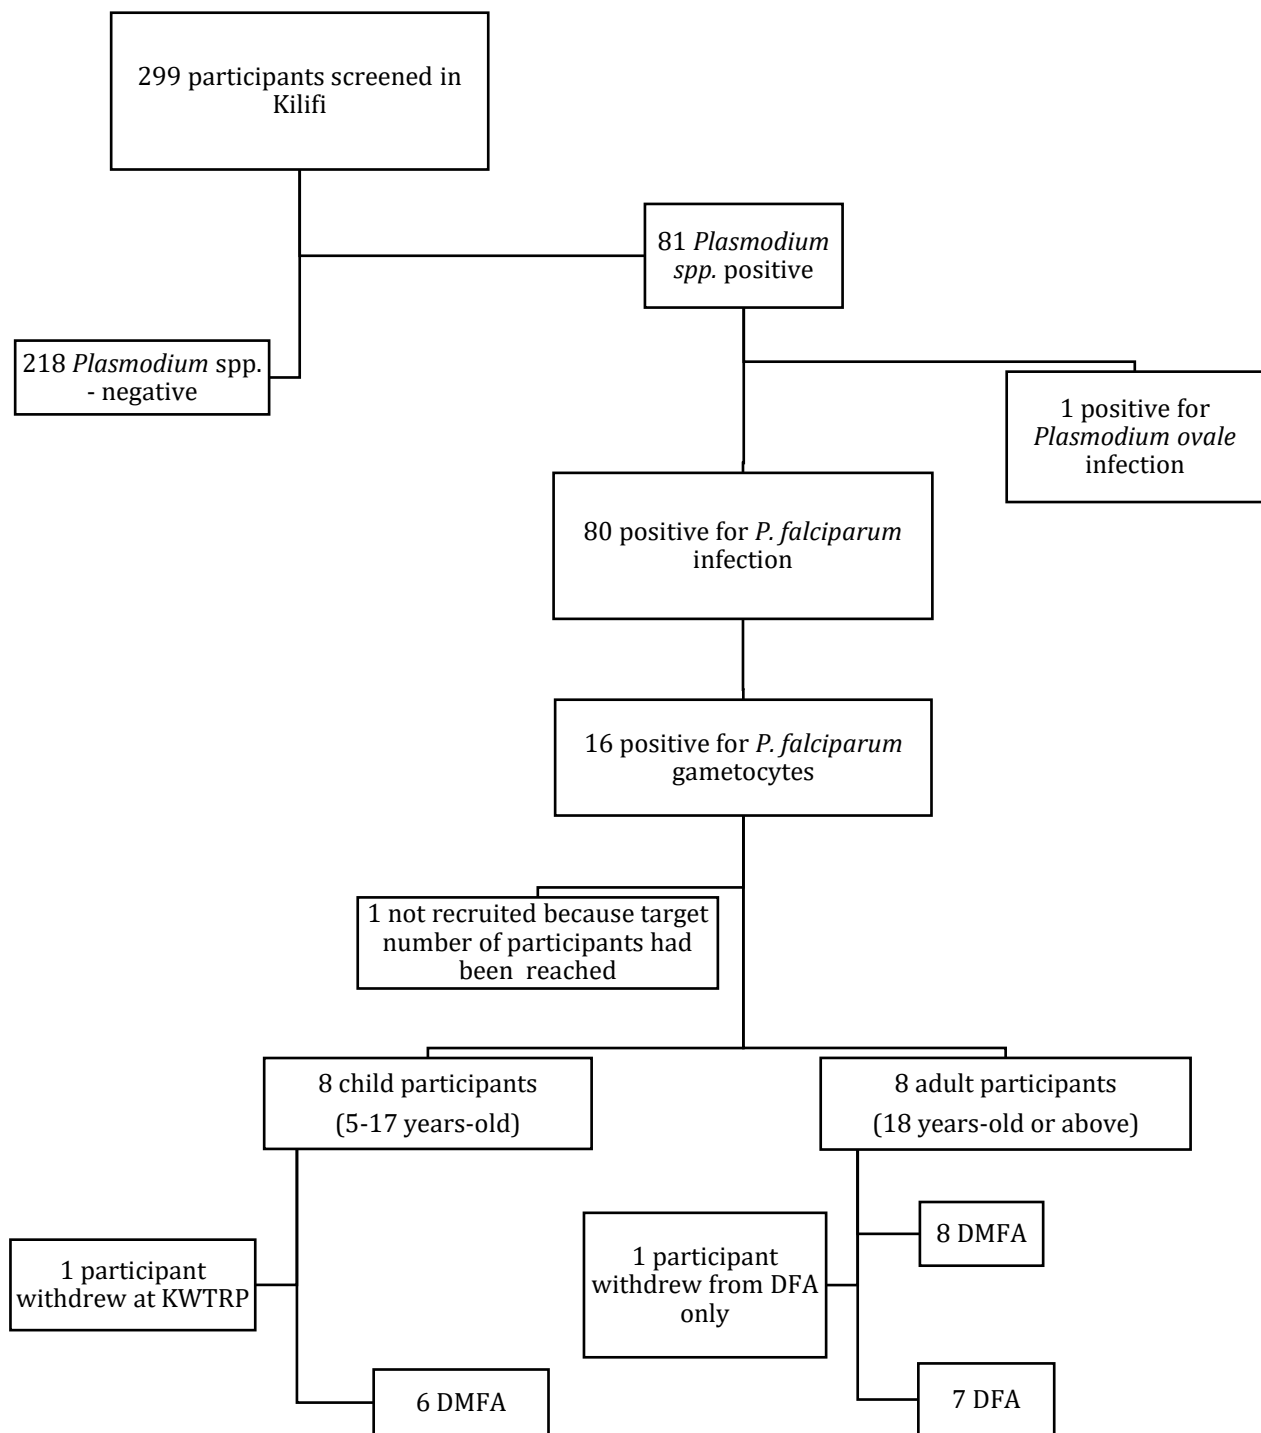

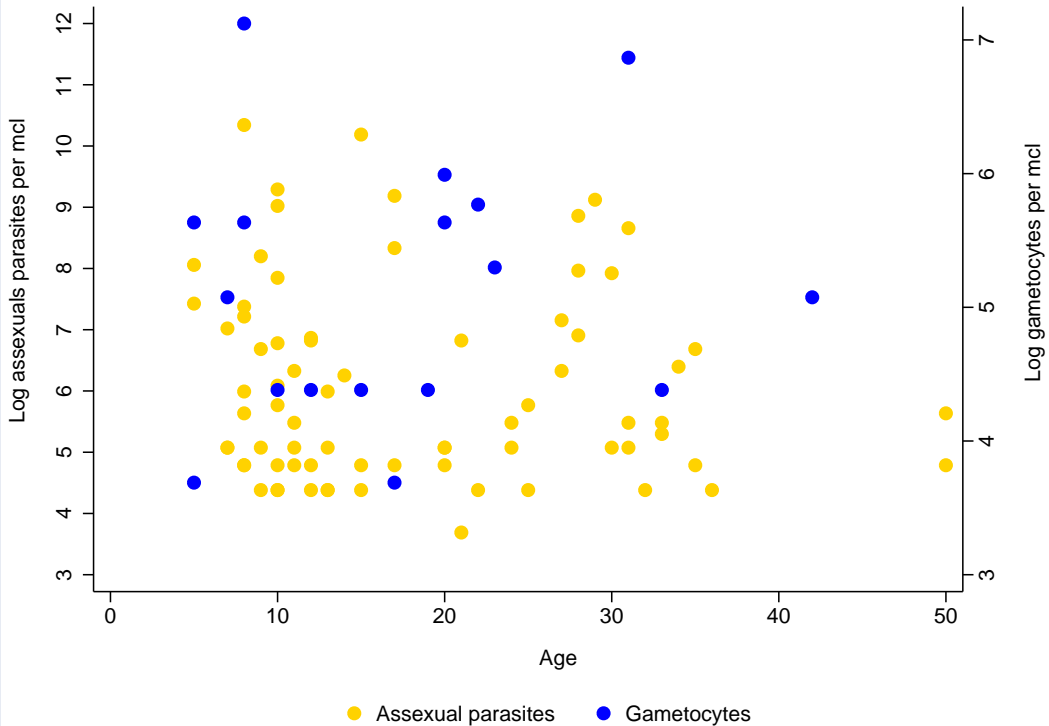



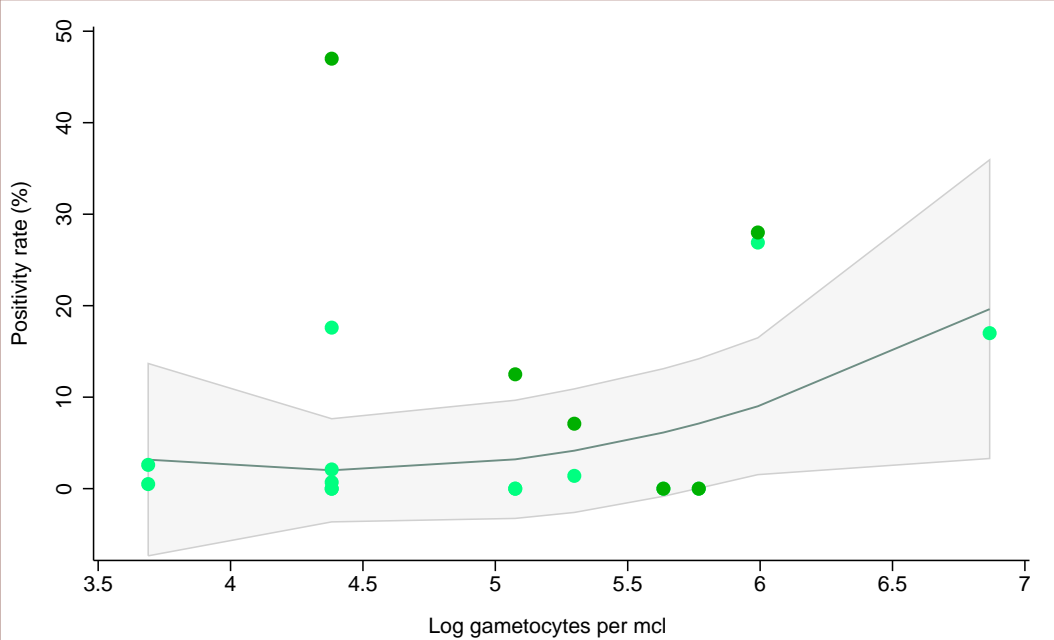

95% CI

predicted positivity rate (%)

DMFA

DFA
